# Supplementary material
Source: Springer Nature journal article supplement (https://www.springermedizin.de/resource/supplementary/12990_2006_62_MOESM1_ESM.pdf/9612488)
Supplement: MOESM1 [file 9612488]

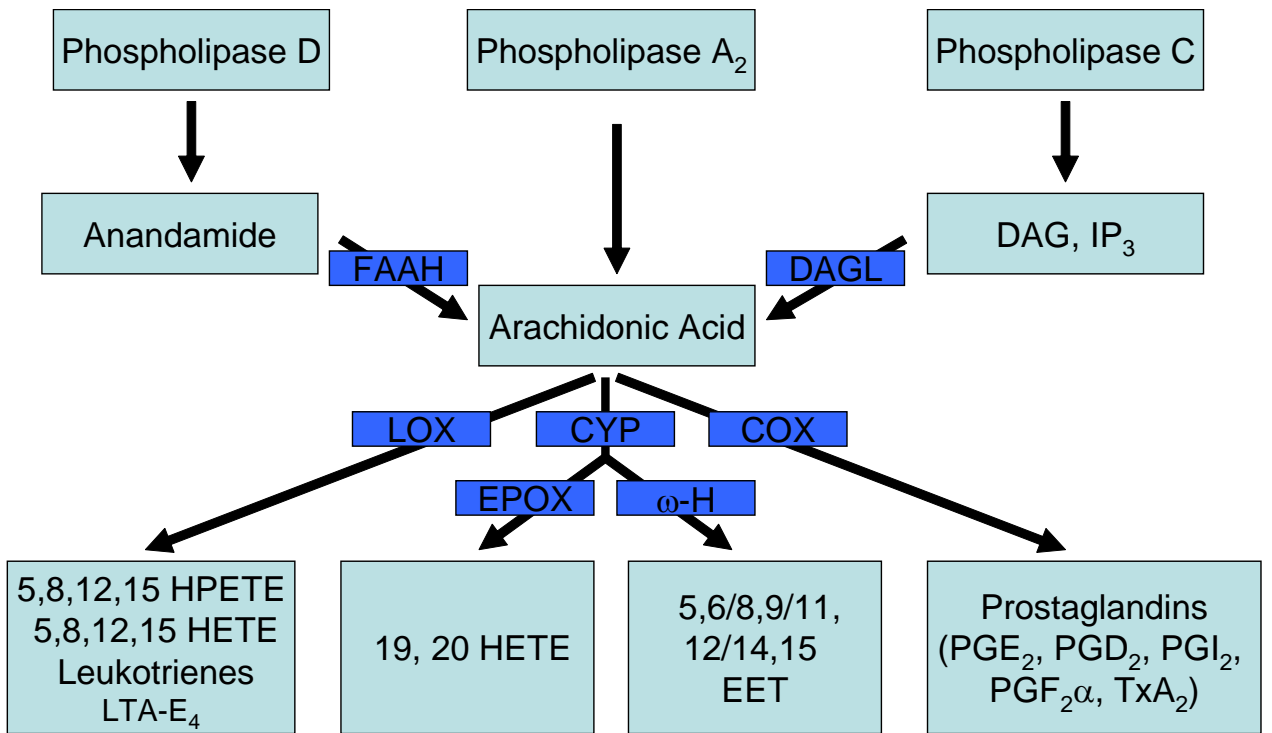

COX, Cyclooxygenase; CYP, Cytochrome P450; DAG, Diacylglycerol; DAGL, Diacylglycerol lipase; EET, Epoxyeicosatrienoic acid; HETE; Hydroxyeicosatetraenoic acid; HPETE; Hydroxyperoxyeicosatetraenoic acid; LOX, Lipoxygenase; LT, Leukotriene; ω-H, Omega-hydroxylase; EPOX, Epoxygenase; FAAH, Fatty-acid amide hydrolase; IP<sub>3</sub>, Inositol-1,4,5-trisphosphate; PG, Prostaglandin; TxA<sub>2</sub>, Thromboxane A<sub>2</sub>
